# Supplementary material for: Oral Cannabis consumption and intraperitoneal THC:CBD dosing results in changes in brain and plasma neurochemicals and endocannabinoids in mice
Source: J Cannabis Res. 2024 Mar 2;6:10. doi: 10.1186/s42238-024-00219-x (PMC10908076; doi:10.1186/s42238-024-00219-x)
Supplement: Supplementary file 2 — Supplementary Material 2. [file 42238_2024_219_MOESM2_ESM.xlsx]

## Sheet: Cannabinoids Brain IP
Treatment	Dose	11_OH_THC	CBD	THC
IP	Control	0	0	0
IP	Control	0	0	0
IP	Control	0	0	0
IP	Low	528.855	89.4311	422.343
IP	Low	0	41.0194	372.065
IP	Low	446.602	93.7604	623.673
IP	Med	0	0	34.1369
IP	Med	0	98.5258	80.6997
IP	Med	0	76.8722	89.6046
IP	High	198.604	68.1088	66.4816
IP	High	329.933	278.852	138.12
IP	High	170.145	130.802	66.9039
ANOVA p-value		0.0609	0.0737	0.0002
Control vs. Low		0.1043	0.4893	0.0002
Control vs. Med		>0.9999	0.6663	0.66
Control vs. High		0.2925	0.0532	0.452
Low vs. Med		0.1043	0.9875	0.0005
Low vs. High		0.8696	0.3938	0.0008
Med vs. High		0.2925	0.2644	0.9794
*One-way ANOVA followed by Tukey's Multiple Comparison's Test

## Sheet: Cannabinoids Plasma IP
Treatment	Dose	11_OH_THC	11-CO2H-THC	CBD	THC
IP	Control	0	0	0	44.4097
IP	Control	0	0	0	0
IP	Control	0	0	0	0
IP	Low	1599.65	1442.95	787.361	3168.54
IP	Low	828.435	921.66	790.434	2839.25
IP	Low	1326.03	1512.15	839.289	3159.24
IP	Med	629.528	0	1746.62	1111.56
IP	Med	319.412	0	903.625	631.853
IP	Med	241.304	0	500.584	401.301
IP	High	922.601	348.149	3982.2	1267.52
IP	High	205.712	0	510.758	258.318
IP	High	382.894	291.68	1293.4	516.029
	ANOVA p-value*	0.0047		0.1878	0.0001
	Control vs. Low	0.0032		0.7414	0.0001
	Control vs. Med	0.392		0.5691	0.1203
	Control vs. High	0.2216		0.1442	0.1435
	Low vs. Med	0.0279		0.9888	0.0001
	Low vs. High	0.0526		0.5188	0.0001
	Med vs. High	0.9671		0.6908	0.9992
	*One-way ANOVA followed by Tukey's Multiple Comparison's Test

## Sheet: Cannabinoids Brain Gavage
Treatment	Dose	11_OH_THC	CBD	THC
Gavage	Control	0	0	0
Gavage	Control	0	0	0
Gavage	Control	0	0	0
Gavage	Low	0	0	103.814
Gavage	Low	0	0	0
Gavage	Low	0	0	0
Gavage	Med	0	0	0
Gavage	Med	0	0	0
Gavage	Med	0	0	0
Gavage	High	0	0	0
Gavage	High	0	0	0
Gavage	High	0	60.0554	0
Gavage	High	0	38.8126	0

## Sheet: Cannabinoids Plasma Gavage
		Treatment	Dose	11_OH_THC	CBD	CBG-Acid	THC
Sample	2020-03-12 22:14:11	Gavage	Control	0	0	0	0
Sample	2020-03-13 00:03:36	Gavage	Control	0	0	0	0
Sample	2020-03-13 03:58:07	Gavage	Control	0	0	0	0
Sample	2020-03-13 02:55:35	Gavage	Low	207.724	161.655	162.173	0
Sample	2020-03-13 03:11:14	Gavage	Low	0	74.7033	299.681	71.4422
Sample	2020-03-13 04:29:24	Gavage	Low	0	89.6937	0	0
Sample	2020-03-12 21:58:32	Gavage	Med	0	157.949	309.646	66.205
Sample	2020-03-13 01:21:49	Gavage	Med	275.077	130.493	337.839	51.8335
Sample	2020-03-13 02:24:18	Gavage	Med	0	52.3083	0	55.2347
Sample	2020-03-12 20:40:24	Gavage	High	270.053	808.42	294.583	121.104
Sample	2020-03-12 21:11:37	Gavage	High	220.967	277.543	696.953	58.2296
Sample	2020-03-12 23:32:21	Gavage	High	396.504	214.919	328.931	97.7953
Sample	2020-03-12 23:48:00	Gavage	High	174.346	507.107	0	85.4543
		One way ANOVA		0.0495	0.0196		0.005
		Tukey's multiple comparisons test
		Control vs. Low		0.8622	0.8353		0.6577
		Control vs. Med		0.7363	0.8173		0.0761
		Control vs. High		0.045	0.0203		0.0046
		Low vs. Med		0.9939	>0.9999		0.391
		Low vs. High		0.1552	0.0776		0.0276
		Med vs. High		0.2272	0.0824		0.3625
		*One-way ANOVA followed by Tukey's Multiple Comparison's Test

## Sheet: Cannabinoids Plasma Free Feed
Treatment	Dose	11_OH_THC Results	CBD Results	THC Results
Free Fed	Control	0	0	0
Free Fed	Control	0	0	0
Free Fed	Control	0	0	0
Free Fed	Low	0	0	0
Free Fed	Low	0	0	0
Free Fed	Low	0	0	0
Free Fed	Low	0	0	0
Free Fed	Low	0	0	0
Free Fed	Medium	0	0	0
Free Fed	Medium	0	0	0
Free Fed	Medium	0	0	0
Free Fed	High	0	0	0
Free Fed	High	0	0	730.299
Free Fed	High	0	0	0
Free Fed	High	0	0	0

## Sheet: ValueList_Helper
Sample
Blank
Cal
QC
CC
DoubleBlank
MatrixSpike
MatrixSpikeDup
MatrixBlank
TuneCheck
ResponseCheck
