# Supplementary material for: Oral Cannabis consumption and intraperitoneal THC:CBD dosing results in changes in brain and plasma neurochemicals and endocannabinoids in mice
Source: J Cannabis Res. 2024 Mar 2;6:10. doi: 10.1186/s42238-024-00219-x (PMC10908076; doi:10.1186/s42238-024-00219-x)
Supplement: Supplementary file 3 — Supplementary Material 3. [file 42238_2024_219_MOESM3_ESM.xlsx]

## Sheet: IP Plasma 
Treatment	Dose	3,4-DiOHPheAc Acid	3-Hydroxy Kynurenine	3-hydroxy-athranilic acid (3-HAA)	5-Hydroxyindole-3-acetic acid (5-HIAA)	5-Hydroxytryptophan	Anthranilic Acid	Arginyl-Phenylalanine	Dopamine	Epinephrine	Glycyl-Phenylalanine	Isopyroxidal	Kynurenic acid	L-DOPA	L-Kynurenine	Metanephrine	NAD+	NAM	N-Formylkynurenine	N-Methylnicotinamide	Norepinephrine (M-H2O)H+	Normetanephrine	Phenylalanine	Picolinic Acid (PA)	Pyroxidal	Quinolinic Acid	Serotonin	Tryptophan	Tyrosine	Xanthurenic Acid
IP	CONTROL	0	0	0	0	0	0	0	0	0	0	0	24.0263	0	251.802	0	47.8303	860.841	75.6317	6.44407	0	0	10633.6	0	11.4339	0	457.215	23098.4	11543.6	18.4336
IP	CONTROL	0	0	0	0	0	0	0	0	0	0	0	34.984	0	240.823	0	19.1396	2020.73	34.7374	6.59578	0	0	9553.47	0	13.4619	0	584.207	20630.5	11460.1	24.2931
IP	CONTROL	0	0	0	0	0	0	0	0	0	0	0	18.3679	0	242.313	0	50.704	2139.17	40.8413	20.0519	0	0	9277.15	0	7.67808	0	553.862	13197.2	6478.43	17.8152
IP	LOW	0	0	0	0	0	0	0	0	0	0	0	14.7832	0	320	0	10.0666	990.846	57.899	4.17785	0	0	11782.9	0	4.02769	0	653.076	24787.9	10508.3	13.2519
IP	LOW	0	0	0	0	0	0	0	0	0	0	0	15.1619	0	243.039	0	22.2378	1387.78	28.1546	9.99845	0	0	9016.23	0	2.15892	0	461.263	14525.4	8320.56	15.1843
IP	LOW	0	0	0	0	0	0	0	0	0	0	0	19.3279	0	198.216	0	56.4915	1191.59	39.9957	3.50139	0	0	12297.4	0	12.4956	0	670.516	17052.1	11960.9	22.2075
IP	MED	0	0	0	0	0	0	0	0	0	0	0	24.5815	0	235.173	0	106.269	2807.71	59.7711	8.48857	0	0	12815.8	0	6.56738	0	1096.18	20393.6	12413.8	28.8787
IP	MED	0	0	0	0	0	0	0	0	0	0	0	30.6844	0	277.837	0	82.5576	1160.85	54.496	21.92	0	0	12187.2	0	16.3341	0	756.802	20004	15661.7	53.5857
IP	MED	0	0	0	0	0	0	0	0	0	0	0	25.1963	0	262.582	0	50.6528	646.686	53.5231	14.1664	0	0	12413.8	0	6.9422	0	792.749	21234.5	16400.8	56.0165
IP	HIGH	0	0	0	0	0	0	0	0	0	0	0	16.7334	0	230.282	0	31.9858	1241.28	49.2205	1.33885	0	0	10423.3	0	8.95044	0	545.212	19598.5	15433.1	14.2306
IP	HIGH	0	0	0	0	0	0	0	9.51459	0	0	0	16.7071	0	246.61	0	62.9639	1115.71	49.55	3.52767	0	0	9465.21	0	7.40862	0	660.355	17561.7	12455.4	11.7163
IP	HIGH	0	0	0	0	0	0	0	0	0	0	0	13.1973	0	201.57	0	31.9252	804.576	65.0331	0	0	0	8226.78	0	6.01833	0	286.453	17164	9237.93	11.9506
													Kynurenic acid	L-DOPA	L-Kynurenine	Metanephrine	NAD+	NAM	N-Formylkynurenine	N-Methylnicotinamide	Norepinephrine (M-H2O)H+	Normetanephrine	Phenylalanine	Picolinic Acid (PA)	Pyroxidal	Quinolinic Acid	Serotonin	Tryptophan	Tyrosine	Xanthurenic Acid
	p-values
	ANOVA*												0.0372		0.6876		0.0985	0.5425	0.6401	0.0788			0.0359		0.5414		0.0486	0.8783	0.14	0.0038
	Cont vs Low												0.0447		0.7648		0.6109	0.4109	0.4893	0.2883			0.2189		0.2173		0.6185	0.9532	0.839	0.6313
	Cont vs Med												0.8007		0.6453		0.056	0.8145	0.6458	0.4214			0.0193		0.799		0.0208	0.6253	0.0427	0.0044
	Cont vs High												0.0316		0.5251		0.8702	0.2984	0.7263	0.0708			0.6336		0.3544		0.785	0.786	0.2547	0.2867
	Low vs Med												0.0298		0.8702		0.0246	0.5493	0.2637	0.0824			0.1512		0.3133		0.0465	0.5854	0.0593	0.0022
	Low vs high												0.8292		0.3586		0.5049	0.813	0.3086	0.3722			0.1047		0.7309		0.4468	0.8312	0.3388	0.5385
	Med vs High												0.0211		0.2862		0.0729	0.4099	0.9114	0.019			0.0091		0.4921		0.0136	0.4531	0.2719	0.001
	*ANOVA analysis with Fishers uncorrected LSD

## Sheet: IP Brain 
Treatment	Dose	3,4-DiOHPheAc Acid Results	3-Hydroxy Kynurenine Results	3-hydroxy-athranilic acid (3-HAA) Results	5-Hydroxyindole-3-acetic acid (5-HIAA)	5-Hydroxytryptophan Results	Anthranilic Acid	Arginyl-Phenylalanine	Dopamine	Epinephrine Results	Glycyl-Phenylalanine Results	Isopyroxidal Results	Kynurenic acid	L-DOPA	L-Kynurenine	Metanephrine	NAD+	NAM	N-Formylkynurenine	N-Methylnicotinamide	Norepinephrine (M-H2O)H+ Results	Normetanephrine	Phenylalanine	Picolinic Acid (PA) Results	Pyroxidal	Quinolinic Acid Results	Serotonin	Tryptophan	Tyrosine	Xanthurenic Acid Results
IP	CONTROL	0	0	0	0	0	1228.69	43.0131	1052.24	0	0	0	18.217	0	120.196	0	1581.27	117155	0	27.0418	0	0	16650.5	0	67.5391	0	66.494	6171.79	20615.1	0
IP	CONTROL	0	0	0	0	0	842.811	41.1317	984.446	0	0	0	17.7353	0	63.6583	0	1632.81	133475	0	31.0974	0	0	13836.4	0	82.0232	0	63.3724	4565.26	10336.4	0
IP	CONTROL	0	0	0	0	0	694.394	42.3315	859.23	0	3.78358	0	17.3206	0	32.9737	0	2631.6	88668.5	14.1258	29.0403	0	0	15222.7	0	72.7272	0	40.2182	5669.1	17020.4	0
IP	LOW	0	0	0	0	0	317.946	40.8701	916.656	0	0	0	17.3302	0	23.4571	0	1703.11	126620	0	18.03	0	0	12327.5	0	114.016	0	44.0278	3444.89	14365.4	0
IP	LOW	0	0	0	0	0	246.459	40.7584	641.205	0	0	0	17.3079	0	30.5006	0	1827.05	104604	5.59667	15.892	0	0	9810.9	0	75.1997	0	24.0952	3355.11	11043.6	0
IP	LOW	0	0	0	0	0	799.492	41.2918	741.096	0	0	0	21.8241	0	50.5341	0	2125.27	86930.6	0	17.4868	0	0	12665	0	64.8377	0	38.288	4758.22	14889.7	0
IP	MED	0	0	0	0	0	937.898	40.5659	682.235	0	0	0	17.4104	0	35.4154	0	1116.44	111834	8.61174	21.4877	0	0	11225	0	100.63	0	29.1374	3930.41	14396	0
IP	MED	0	0	0	0	0	297.031	41.3842	702.815	0	0	0	17.6075	0	25.2635	0	1438.46	102126	10.5273	16.5725	0	0	12158.3	0	63.3354	0	33.4663	4009.66	14064.9	0
IP	MED	0	0	0	0	0	268.263	40.5394	669.655	0	0	0	17.655	0	44.6253	0	1502.12	103680	2.73524	16.7664	0	0	10474.3	0	77.5105	0	38.0174	3432.85	13052.2	0
IP	HIGH	0	0	0	0	0	912.361	41.0573	712.286	0	0	0	19.4246	0	16.5171	0	1784.5	107269	8.31141	18.3014	0	0	13264.8	0	94.7539	0	32.846	4134.31	17574	0
IP	HIGH	0	0	0	0	0	855.653	40.9226	675.058	0	0	0	17.4303	0	19.8918	0	1418.76	107069	7.61783	11.7938	0	0	10375.2	0	67.6793	0	42.7964	3687.94	10090.3	0
IP	HIGH	0	0	0	0	0	767.997	40.8082	671.284	0	0	0	17.2806	0	27.0402	0	1144.68	109966	0	25.3585	0	0	10263.9	0	91.9884	0	31.3273	3485.86	11822.4	0
							Anthranilic Acid	Arginyl-Phenylalanine	Dopamine	Epinephrine Results	Glycyl-Phenylalanine Results	Isopyroxidal Results	Kynurenic acid	L-DOPA	L-Kynurenine	Metanephrine	NAD+	NAM	N-Formylkynurenine	N-Methylnicotinamide	Norepinephrine (M-H2O)H+ Results	Normetanephrine	Phenylalanine	Picolinic Acid (PA) Results	Pyroxidal	Quinolinic Acid Results	Serotonin	Tryptophan	Tyrosine
	p-values
	ANOVA						0.1732	0.068	0.0125				0.7388		0.1294		0.1913	0.9302	0.6766	0.0172			0.0235		0.2348		0.0554	0.0235	0.7442
	Cont vs Low						0.0758	0.0385	0.0225				0.3931		0.0905		0.8383	0.5887	0.5338	0.0054			0.0137		0.4924		0.027	0.012	0.3894
	Cont vs Med						0.1036	0.0219	0.0041				0.8913		0.0925		0.0829	0.5798	0.571	0.0092			0.0091		0.6755		0.0185	0.01	0.4657
	Cont vs High						0.7468	0.0307	0.0042				0.806		0.0303		0.1357	0.7	0.8943	0.0101			0.0093		0.4858		0.0279	0.0094	0.3437
	Low vs Med						0.8445	0.7255	0.2815				0.3272		0.9894		0.1146	0.9894	0.2498	0.7203			0.792		0.7829		0.8119	0.9048	0.889
	Low vs high						0.1266	0.8879	0.2889				0.5347		0.5016		0.1856	0.8739	0.4537	0.6754			0.8019		0.9913		0.9836	0.8717	0.9256
	Med vs High						0.1714	0.8327	0.9854				0.7033		0.4936		0.7555	0.8635	0.6622	0.9509			0.9897		0.7745		0.796	0.9666	0.8161
	*ANOVA analysis with Fishers uncorrected LSD

## Sheet: Gavage Plasma
Treatment	Dose	3,4-DiOHPheAc Acid	3-Hydroxy Kynurenine	3-hydroxy-athranilic acid (3-HAA)	5-Hydroxyindole-3-acetic acid (5-HIAA)	5-Hydroxytryptophan	Anthranilic Acid	Arginyl-Phenylalanine	Dopamine	Epinephrine	Glycyl-Phenylalanine	Isopyroxidal	Kynurenic acid	L-DOPA	L-Kynurenine	Metanephrine	NAD+	NAM	N-Formylkynurenine	N-Methylnicotinamide	Norepinephrine (M-H2O)H+	Normetanephrine	Phenylalanine	Picolinic Acid (PA)	Pyroxidal	Quinolinic Acid	Serotonin	Tryptophan	Tyrosine	Xanthurenic Acid
GAVAGE	CONTROL	0	0	0	0	0	0	0	0	0	0	0	46.957	0	290.384	0	60.6998	1386.95	43.7451	18.9219	0	0	11965.7	0	6.11944	0	930.523	26439.3	13613.3	26.0401
GAVAGE	CONTROL	0	0	0	0	0	0	0	10.8927	0	0	0	14.0871	0	211.056	0	19.7574	1207.65	40.5666	13.0804	0	0	9585.29	0	7.6373	0	568.283	21459.5	7117.76	12.3207
GAVAGE	CONTROL	0	0	0	0	0	0	0	0	0	0	0	15.1146	0	167.98	0	45.3939	2447.25	36.6548	14.5298	0	0	11852.1	0	11.5733	0	646.899	17453.7	10283.3	14.5756
GAVAGE	LOW	0	0	0	0	0	0	0	0	0	0	0	20.0696	0	236.387	0	79.8524	1154.78	43.4326	0.279324	0	0	13055.2	0	15.8321	0	709.455	20207.5	13263	22.5865
GAVAGE	LOW	0	0	0	0	0	0	0	0	0	0	0	21.3221	0	174.592	0	22.9243	742.208	35.4429	2.85266	0	0	10926.8	0	8.40197	0	714.033	15968.4	12178.4	36.4888
GAVAGE	LOW	0	0	0	0	0	0	0	0	0	0	0	14.546	0	164.677	0	37.0379	490.072	47.2736	0.10139	0	0	10819.8	0	8.53185	0	741.826	17337.9	11447.9	18.4202
GAVAGE	MED	0	0	0	0	0	0	0	31.6685	0	0	0	14.8427	0	229.848	0	82.4956	872.601	27.2873	1.31616	0	0	10088.3	0	10.3518	0	1275.69	16299.4	10797.7	17.7998
GAVAGE	MED	0	0	0	0	0	0	0	0	0	0	0	17.4979	0	213.205	0	56.5785	550.826	39.2091	0.016119	0	0	11382.6	0	9.20791	0	894.175	17949.6	14231.5	18.7178
GAVAGE	MED	0	0	0	0	0	0	0	0	0	0	0	37.6334	0	381.946	0	80.1193	1328.56	55.2283	9.40429	0	0	13274.3	0	14.9658	0	637.403	21116	14081.3	24.8566
GAVAGE	HIGH	0	0	0	0	0	0	0	25.961	0	0	0	16.6764	0	284.338	0	21.6195	893.502	34.5199	6.6719	0	0	8453.19	0	5.7287	0	522.77	14262.9	5940.02	14.3881
GAVAGE	HIGH	0	0	0	0	0	0	0	0	0	0	0	25.905	0	245.076	0	73.1917	1139.7	49.9632	0	0	0	12865.5	0	10.3895	0	697.962	21124.1	15418.1	49.329
GAVAGE	HIGH	0	0	0	0	0	0	0	0	0	0	0	23.3374	0	259.912	0	28.1663	829.994	34.5098	7.14409	0	0	12148.9	0	13.5904	0	607.419	20474.9	13041.1	25.0789
GAVAGE	HIGH	0	0	0	0	0	0	0	0	0	0	0	15.0803	0	258.149	0	56.6764	736.391	35.8687	8.53781	0	0	10610.8	0	8.33139	0	874.95	18409.4	12122.5	11.1539
									Dopamine	Epinephrine	Glycyl-Phenylalanine	Isopyroxidal	Kynurenic acid	L-DOPA	L-Kynurenine	Metanephrine	NAD+	NAM	N-Formylkynurenine	N-Methylnicotinamide	Norepinephrine (M-H2O)H+	Normetanephrine	Phenylalanine	Picolinic Acid (PA)	Pyroxidal	Quinolinic Acid	Serotonin	Tryptophan	Tyrosine	Xanthurenic Acid
	p-values
	ANOVA												0.8743		0.3069		0.3644	0.0864	0.9647	0.0043			0.9483		0.6863		0.3871	0.4556	0.4487	0.7908
	Cont vs Low												0.4774		0.5158		0.8103	0.0269	0.8106	0.0009			0.7312		0.3945		0.9684	0.162	0.4398	0.4102
	Cont vs Med												0.8257		0.2908		0.1328	0.0488	0.972	0.003			0.7416		0.2975		0.2027	0.2308	0.2942	0.7734
	Cont vs High												0.5608		0.3936		0.8701	0.0345	0.8116	0.0059			0.9277		0.6904		0.7986	0.2171	0.5825	0.4291
	Low vs Med												0.6193		0.1056		0.1935	0.7251	0.8378	0.4205			0.9889		0.8371		0.2152	0.817	0.7669	0.5846
	Low vs high												0.8546		0.1399		0.9256	0.7473	0.6228	0.1381			0.648		0.5993		0.7663	0.7701	0.7755	0.9262
	Med vs High												0.726		0.7682		0.1444	0.9569	0.7828	0.4868			0.6586		0.4606		0.1174	0.9639	0.5503	0.6218
	*ANOVA analysis with Fishers uncorrected LSD

## Sheet: Gavage Brain
Treatment	Dose	3,4-DiOHPheAc Acid Results	3-Hydroxy Kynurenine Results	3-hydroxy-athranilic acid (3-HAA) Results	5-Hydroxyindole-3-acetic acid (5-HIAA)	5-Hydroxytryptophan Results	Anthranilic Acid	Arginyl-Phenylalanine	Dopamine	Epinephrine Results	Glycyl-Phenylalanine Results	Isopyroxidal Results	Kynurenic acid	L-DOPA	L-Kynurenine	Metanephrine	NAD+	NAM	N-Formylkynurenine	N-Methylnicotinamide	Norepinephrine (M-H2O)H+ Results	Normetanephrine	Phenylalanine	Picolinic Acid (PA) Results	Pyroxidal	Quinolinic Acid Results	Serotonin	Tryptophan	Tyrosine	Xanthurenic Acid Results
GAVAGE	CONTROL	0	0	0	0	0	973.198	41.2854	858.405	0	0	0	17.5522	0	54.8914	0	1753.95	118693	10.0299	34.8129	0	0	13019.5	0	67.0337	0	48.5016	5034.46	13333.8	0
GAVAGE	CONTROL	0	0	0	0	0	987.983	41.3438	784.415	0	0	0	17.3592	0	20.003	0	1889.14	106819	0	24.0534	0	0	12522.8	0	67.5976	0	41.5879	4296.2	12135.2	0
GAVAGE	CONTROL	0	0	0	0	0	893.071	41.2884	708.106	0	0	0	17.7537	0	35.2411	0	1937.02	79438.7	0	29.9136	0	0	14217.6	0	68.6813	0	46.6627	5129.78	21146.1	0
GAVAGE	LOW	0	0	0	0	0	906.646	41.319	649.213	0	0	0	17.6093	0	25.2172	0	1399.72	94518	0	16.9266	0	0	9938.47	0	53.6439	0	26.3061	3114.1	12341.8	0
GAVAGE	LOW	0	0	0	0	0	317.668	40.6518	730.144	0	0	0	17.3152	0	25.0366	0	1492.51	129391	2.8302	18.0342	0	0	10934.4	0	91.5831	0	48.6603	3122.25	12340	0
GAVAGE	LOW	0	0	0	0	0	280.714	41.5675	878.153	0	0	0	17.3072	0	22.3813	0	1600.03	90478.6	4.77198	15.1981	0	0	11853.4	0	79.9816	0	46.3636	3767.91	15593.1	0
GAVAGE	MED	0	0	0	0	0	850.88	41.5402	705.384	0	0	0	17.4604	0	40.6905	0	1662.64	72903.1	5.19784	22.9855	0	0	12014.2	0	41.7637	0	45.9168	4041.3	14649.6	0
GAVAGE	MED	0	0	0	0	0	827.893	40.6868	673.014	0	0	0	17.4355	0	19.6834	0	1380.01	99021.4	10.7517	17.1165	0	0	10585.4	0	75.1519	0	35.3446	3535.84	15208.9	0
GAVAGE	MED	0	0	0	0	0	724.978	41.2554	785.298	0	0	0	17.1256	0	60.4756	0	1989.93	100754	5.14155	5.55402	0	0	12611.5	0	101.937	0	59.8085	4969.98	16948.3	0
GAVAGE	HIGH	0	0	0	0	0	1003.25	41.1248	885.319	0	0	0	18.0545	0	25.6988	0	1616.53	89968.7	7.25789	13.9443	0	0	12282.7	0	50.7524	0	56.863	3819.12	12313.8	0
GAVAGE	HIGH	0	0	0	0	0	241.913	40.8854	707.22	0	0	0	17.8698	0	29.8218	0	2409.03	140346	0	32.6053	0	0	11728	0	136.981	0	32.5709	3820.86	16454.8	0
GAVAGE	HIGH	0	0	0	0	0	771.509	41.1431	709.748	0	0	0	17.3509	0	23.19	0	1837.87	108293	0	15.1299	0	0	10502.2	0	82.0178	0	44.2214	3448.98	11145	0
GAVAGE	HIGH	0	0	0	0	0	1120.83	40.926	772.459	0	0	0	17.6896	0	41.8498	0	1709.17	119123	0	17.6768	0	0	11396.2	0	81.4578	0	62.5101	3915.26	11906.1	0
							Anthranilic Acid	Arginyl-Phenylalanine	Dopamine	Epinephrine Results	Glycyl-Phenylalanine Results	Isopyroxidal Results	Kynurenic acid	L-DOPA	L-Kynurenine	Metanephrine	NAD+	NAM	N-Formylkynurenine	N-Methylnicotinamide	Norepinephrine (M-H2O)H+ Results	Normetanephrine	Phenylalanine	Picolinic Acid (PA) Results	Pyroxidal	Quinolinic Acid Results	Serotonin	Tryptophan	Tyrosine
	p-values
	ANOVA						0.3243	0.6218	0.8251				0.122		0.5042		0.2536	0.5146	0.3931	0.1212			0.0515		0.7797		0.7977	0.0166	0.5392
	Cont vs Low						0.0826	0.692	0.6662				0.3231		0.2879		0.1206	0.8504	0.8063	0.0509			0.0106		0.7458		0.5945	0.0032	0.3928
	Cont vs Med						0.5308	0.5987	0.3948				0.1968		0.7524		0.4105	0.5233	0.28	0.0334			0.0675		0.8171		0.8837	0.1219	0.9789
	Cont vs High						0.458	0.222	0.824				0.3537		0.5412		0.8708	0.4208	0.6227	0.1015			0.0287		0.3517		0.7009	0.0136	0.2709
	Low vs Med						0.2257	0.8945	0.6649				0.7355		0.1797		0.4166	0.413	0.1944	0.8037			0.2857		0.9255		0.5002	0.0494	0.3793
	Low vs high						0.222	0.4045	0.81				0.0656		0.5811		0.0765	0.5406	0.8161	0.5741			0.4265		0.5477		0.3496	0.2639	0.8358
	Med vs High						0.9391	0.4846	0.4861				0.0357		0.3514		0.3041	0.1547	0.1162	0.4138			0.7124		0.4854		0.819	0.2484	0.2601
	*ANOVA analysis with Fishers uncorrected LSD

## Sheet: Free Fed Plasma
Treatment	Dose	3,4-DiOHPheAc Acid	3-Hydroxy Kynurenine	3-hydroxy-athranilic acid (3-HAA)	5-Hydroxyi0ole-3-acetic acid (5-HIAA)	5-Hydroxytryptophan	Anthranilic Acid	Arginyl-Phenylalanine	Dopamine	Epinephrine	Glycyl-Phenylalanine	Isopyridoxal	Kynurenic acid	L-DOPA	L-Kynurenine	Metanephrine	NAD+	NAM	N-Formylkynurenine	N-Methylnicotinamide	Norepinephrine (M-H2O)H+	Normetanephrine	Phenylalanine	Picolinic Acid (PA)	Pyridoxal	Quinolinic Acid	Serotonin	Tryptophan	Tyrosine	Xanthurenic Acid
Free Feed	CONTROL	0	0	0	0	0	39.182	0	45.8447	0	0	0	9.97143	0	292.244	0	72.048	330.68	74.7003	34.7384	0	0	15308.2	0	2.27193	0	769.265	15444.5	21082	16.8038
Free Feed	CONTROL	0	0	0	0	0	45.494	0	50.7241	0	0	0	8.24234	0	178.974	0	23.3761	350.681	53.7091	44.0004	0	0	15537.7	0	8.95075	0	625.806	16514.6	15439.6	15.4423
Free Feed	CONTROL	0	0	0	0	0	41.8432	0	49.8613	0	0	0	11.0909	0	313.959	0	18.205	648.604	113.714	53.8532	0	0	15896.4	0	9.00226	0	346.432	17886.6	14515.8	14.7738
Free Feed	LOW	0	0	0	0	0	56.2241	0	0	0	0	0	145.403	0	241.864	254.218	12.1952	553.613	51.7864	60.0205	0	0	15722.1	0	8.55782	0	1495.57	11853.4	22926.7	318.303
Free Feed	LOW	0	0	0	0	0	51.89	0	54.8283	0	0	0	11.131	0	248.553	0	33.2426	391.261	62.5628	46.4393	0	0	12464.5	0	4.52878	0	707.502	14133.9	12122.8	16.8098
Free Feed	LOW	0	0	0	0	0	0	0	57.0947	0	0	0	17.1492	0	271.681	248.068	64.1198	474.057	50.3419	38.4441	0	0	12219.5	0	8.7432	0	1341.07	15572.5	20183.8	19.4816
Free Feed	LOW	0	0	0	0	0	41.1037	0	51.5703	0	0	0	7.37559	0	208.238	0	16.9312	312.176	53.0966	40.0727	0	0	25206.5	0	4.80096	0	1008.91	14816	28960.2	11.4163
Free Feed	LOW	0	0	0	0	0	41.7264	0	51.0983	0	0	0	9.63887	0	212.436	0	14.7707	415.981	72.4436	39.7035	0	0	14809.7	0	4.54654	0	675.993	14972.6	15064.8	12.5209
Free Feed	MED	0	0	0	0	0	43.3274	0	51.6537	0	0	0	10.4515	0	158.102	0	16.0594	322.229	67.3599	38.5198	0	0	10683.6	0	4.74797	0	574.136	13014.8	13340.3	13.2053
Free Feed	MED	0	0	0	0	0	32.2557	0	0	0	0	0	6.60555	0	224.965	0	12.9824	242.111	45.341	34.5015	0	0	19312	0	5.60937	0	640.831	12568.5	18914.2	11.546
Free Feed	MED	0	0	0	0	0	58.7222	0	52.1062	0	0	0	11.0299	0	208.85	0	15.3447	437.176	48.4435	44.3569	0	0	12108.9	0	6.00123	0	438.292	12166.8	11169.5	20.5698
Free Feed	HIGH	0	0	0	0	0	46.5285	0	50.2416	0	0	0	9.17175	0	258.542	0	17.5587	379.343	50.2852	43.948	0	0	13703.3	0	2.74774	0	478.414	12199.9	10906.4	17.2717
Free Feed	HIGH	0	0	0	0	0	59.8079	0	62.1014	0	0	0	9.49032	0	171.586	0	180.564	671.555	53.0894	53.3409	0	0	12438.1	0	2.77521	0	528.829	10497.9	11725.6	15.988
Free Feed	HIGH	0	0	0	0	0	46.7626	0	76.1252	0	0	0	13.2769	0	227.408	0	12.8687	304.584	68.67	39.1838	0	0	15368	0	2.50192	0	1289.3	16952.5	16577.6	17.8525
Free Feed	HIGH	0	0	0	0	0	42.1626	0	48.1668	0	0	0	6.8709	0	184.781	0	16.501	298.524	59.246	37.8035	0	0	9428.76	0	2.03588	0	500.936	11900.5	10248.5	11.1147
							Anthranilic Acid	Arginyl-Phenylalanine	Dopamine	Epinephrine	Glycyl-Phenylalanine	Isopyridoxal	Kynurenic acid	L-DOPA	L-Kynurenine	Metanephrine	NAD+	NAM	N-Formylkynurenine	N-Methylnicotinamide	Norepinephrine (M-H2O)H+	Normetanephrine	Phenylalanine	Picolinic Acid (PA)	Pyridoxal	Quinolinic Acid	Serotonin	Tryptophan	Tyrosine	Xanthurenic Acid
	p-values
	ANOVA						0.7693		0.4696				0.5794		0.2959	ND	0.6788	0.7566	0.1863	0.7876			0.6274		0.076		0.1546	0.0615	0.1808	0.6271
	Cont vs Low						0.7261		0.7023				0.3074		0.4415	ND	0.7833	0.8925	0.0727	0.9041			0.8658		0.7345		0.0713	0.1009	0.4384	0.3368
	Cont vs Med						0.8378		0.4148				0.9895		0.0948	ND	0.558	0.3507	0.0581	0.4542			0.6442		0.4639		0.9121	0.0188	0.5335	0.9934
	Cont vs High						0.5775		0.5226				0.9988		0.149	ND	0.6047	0.7818	0.0818	0.9172			0.37		0.0249		0.6355	0.0199	0.2342	0.9989
	Low vs Med						0.5646		0.5899				0.301		0.2389	ND	0.7015	0.3619	0.7111	0.3432			0.4961		0.6265		0.0574	0.2244	0.156	0.3324
	Low vs high						0.3185		0.2633				0.2679		0.3888	ND	0.3805	0.866	0.984	0.8032			0.2364		0.0257		0.134	0.2751	0.0414	0.2969
	Med vs High						0.733		0.1456				0.9899		0.6949	ND	0.2634	0.4644	0.7363	0.4848			0.6776		0.1019		0.5555	0.8283	0.5792	0.9941
	*ANOVA analysis with Fishers uncorrected LSD

## Sheet: Free Fed Brains
Treatment	Dose	3,4-DiOHPheAc Acid	3-Hydroxy Kynurenine	3-hydroxy-athranilic acid (3-HAA)	5-Hydroxyindole-3-acetic acid (5-HIAA)	5-Hydroxytryptophan	Anthranilic Acid	Arginyl-Phenylalanine	Dopamine	Epinephrine	Glycyl-Phenylalanine	Isopyridoxal	Kynurenic acid	L-DOPA	L-Kynurenine	Metanephrine	NAD+	NAM	N-Formylkynurenine	N-Methylnicotinamide	Norepinephrine (M-H2O)H+	Normetanephrine	Phenylalanine	Pyridoxal	Quinolinic Acid	Serotonin	Tryptophan	Tyrosine	Xanthurenic Acid
Free Fed	Control	48.3653	0	0	0	0	110.256	0	566.871	0	0	0	3.03495	0	0	0	1344.6	109868	0	90.4403	0	0	12466.9	252.235	108.046	226.188	3904.7	14888.8	0
Free Fed	Control	45.4603	0	0	0	0	102.024	0	546.787	0	0	0	3.07447	0	4.90251	0	1105.42	101395	0	111.335	0	0	12352.1	350.141	160.008	191.733	3349.15	20319.6	0
Free Fed	Control	18.7216	0	0	0	0	106.187	0	608.928	0	0	0	ND	0	22.6851	0	1290.95	85296	0	100.784	0	0	12553.1	172.427	0	197.93	4047.3	13926.6	0
Free Fed	Control	60.4076	0	0	0	0	89.5511	0	754.037	0	0	0	3.55482	0	7.24119	0	1973.5	133090	0	96.1292	0	0	12653.6	317.366	0	201.542	4571.68	24304.5	0
Free Fed	Control	71.0056	0	0	0	0	103.666	0	573.594	0	0	0	2.81963	0	0	0	1501.92	135594	0	97.4463	0	0	13807.5	388.35	237.327	217.087	3754.04	20418.3	0
Free Fed	Low	26.1671	0	0	0	0	85.1649	0	327.179	0	0	0	ND	0	0	0	1118.86	98965.9	0	82.3361	0	0	10378.1	234.014	0	171.742	2983.09	12539.8	0
Free Fed	Low	57.4466	0	0	0	0	119.258	0	874.992	0	0	0	3.05269	0	24.2094	0	1305.13	113131	0	117.453	0	0	13977.8	415.128	82.9658	255.168	5130.09	21518.2	0
Free Fed	Low	94.6547	0	0	0	0	ND	0	806.958	0	0	0	3.86412	0	1.12339	0	1112.03	112450	0	97.2803	0	0	12162.5	673.11	140.408	215.542	4087.21	18851.8	0
Free Fed	Low	40.2927	0	0	0	0	ND	0	416.63	0	0	0	ND	0	0	0	975.519	109047	0	98.8428	0	0	10368.9	351.67	96.9844	193.054	3455.33	14434.9	0
Free Fed	Low	40.2493	0	0	0	0	101.692	0	602.207	0	0	0	2.68748	0	35.9257	0	1010.02	91445.1	0	93.2376	0	0	22028	277.265	87.1816	185.995	4419.01	25633.5	0
Free Fed	Med	60.3099	0	0	0	0	99.2097	0	415.805	0	0	0	4.05788	0	0	0	1145.64	109145	0	100.213	0	0	11769.9	344.22	51.0571	131.799	3597.74	16251.5	0
Free Fed	Med	61.9977	0	0	0	0	81.3831	0	574.224	0	0	0	ND	0	3.37118	0	1400.09	99753.8	0	88.8749	0	0	21335	296.989	65.363	180.393	4996.41	22878.1	0
Free Fed	Med	85.8527	0	0	0	0	97.6832	0	507.789	0	0	0	3.38675	0	0	0	1086.17	88296.6	0	96.0328	0	0	11920	416.172	119.96	136.058	3168.52	16322.6	0
Free Fed	Med	126.03	0	0	0	0	107.173	0	730.484	0	0	0	3.11791	0	0	0	1032.55	131004	0	103.971	0	0	10728.3	784.182	237.834	207.979	3527.54	17305.3	0
Free Fed	Med	70.6558	0	0	0	0	ND	0	589.176	0	0	0	2.66311	0	11.3941	0	1464.99	97176.1	0	90.761	0	0	12428	390.026	68.426	198.267	3826.56	12938.1	0
Free Fed	High	17.5159	0	0	0	0	104.414	0	507.777	0	0	0	2.82807	0	0	0	1210.76	95865.8	0	97.9309	0	0	10180.8	183.366	104.85	217.589	3288.58	15179.9	0
Free Fed	High	39.0899	0	0	0	0	ND	0	487.378	0	0	0	2.59254	0	0	0	1428.35	92141	0	94.4904	0	0	13028.4	198.88	142.01	193.581	3501.79	14235.5	0
Free Fed	High	53.9687	0	0	0	0	111.685	0	574.553	0	0	0	3.20641	0	0	0	1207.48	106246	0	96.8021	0	0	11186.7	286.125	0	168.954	3958.18	18115.9	0
Free Fed	High	29.01	0	0	0	0	86.2765	0	695.723	0	0	0	ND	0	0	0	1485.41	95719.1	0	98.1296	0	0	13133.8	196.202	170.995	212.571	3649.13	13935.2	0
Free Fed	High	44.7708	0	0	0	0	ND	0	532.205	0	0	0	3.40627	0	14.5828	0	1029.68	111796	0	79.6601	0	0	10730.5	301.662	0	192.043	3689.11	12939.1	0
Free Fed	High	58.2455	0	0	0	0	ND	0	503.544	0	0	0	3.04805	0	0	0	907.775	117582	0	86.6872	0	0	8920.14	360.956	120.728	160.13	2917	14117.2	0
	p-values	3,4-DiOHPheAc Acid	3-Hydroxy Kynurenine	3-hydroxy-athranilic acid (3-HAA)	5-Hydroxyindole-3-acetic acid (5-HIAA)	5-Hydroxytryptophan	Anthranilic Acid	Arginyl-Phenylalanine	Dopamine	Epinephrine	Glycyl-Phenylalanine	Isopyridoxal	Kynurenic acid	L-DOPA	L-Kynurenine	Metanephrine	NAD+	NAM	N-Formylkynurenine	N-Methylnicotinamide	Norepinephrine (M-H2O)H+	Normetanephrine	Phenylalanine	Pyridoxal	Quinolinic Acid	Serotonin	Tryptophan	Tyrosine
	ANOVA	0.0467					0.8781		0.8654				0.8076		0.3979		0.1642	0.7198		0.5962			0.5486	0.1338	0.3508	0.1802	0.5216	0.3095
	Cont vs Low	0.8359					0.9726		0.9608				0.8148		0.4216		0.0321	0.405		0.8058			0.6319	0.2971	0.0998	0.8821	0.8171	0.9435
	Cont vs Med	0.0357					0.4641		0.6084				0.5624		0.5401		0.1527	0.4088		0.5676			0.6816	0.1042	0.2453	0.0521	0.7923	0.5137
	Cont vs High	0.5442					0.8604		0.4928				0.7479		0.4705		0.1139	0.291		0.2118			0.4421	0.6261	0.1219	0.3434	0.2608	0.1046
	Low vs Med	0.054					0.5399		0.6428				0.7604		0.1656		0.414	0.9944		0.7431			0.9446	0.5302	0.5385	0.0694	0.6218	0.5596
	Low vs high	0.4133					0.8992		0.5251				0.5907		0.1284		0.4509	0.8456		0.3145			0.2121	0.1237	0.8435	0.425	0.177	0.1195
	Med vs High	0.008					0.631		0.8781				0.3575		0.9333		0.9192	0.8398		0.5004			0.238	0.0351	0.6546	0.2442	0.3891	0.323
	*ANOVA analysis with Fishers uncorrected LSD

## Sheet: ValueList_Helper
Sample
Blank
Cal
QC
CC
DoubleBlank
MatrixSpike
MatrixSpikeDup
MatrixBlank
TuneCheck
ResponseCheck
