# Supplementary material for: Oral Cannabis consumption and intraperitoneal THC:CBD dosing results in changes in brain and plasma neurochemicals and endocannabinoids in mice
Source: J Cannabis Res. 2024 Mar 2;6:10. doi: 10.1186/s42238-024-00219-x (PMC10908076; doi:10.1186/s42238-024-00219-x)
Supplement: Supplementary file 4 — Supplementary Material 4. [file 42238_2024_219_MOESM4_ESM.xlsx]

## Sheet: 2 AG and AEA Brain
Brain	2-Arachidonoyl Glycerol (2-AG)	2-Arachidonoyl Glycerol (2-AG)	2-Arachidonoyl Glycerol (2-AG)	Arachidonoyl Ethanolamide (AEA)	Arachidonoyl Ethanolamide (AEA)	Arachidonoyl Ethanolamide (AEA)
Dose	IP	Gavage	Free Fed	IP	Gavage	Free Fed
Control	28.6872	49.6342	312.63	6.3112	2.76327	6.423
Control	29.3014	43.7458	64.2427	5.67275	3.57856	5.70549
Control	159.581	33.1492	217.503	7.74574	3.16335	5.58013
Control	39.3102	NA	168.643	4.51717	NA	4.80482
Control	33.461	NA	100.848	4.2861	NA	5.31156
Low	NA	30.6687	40.6373	NA	2.63717	3.76104
Low	NA	37.0049	371.015	NA	2.6405	5.29982
Low	NA	32.1811	80.1485	NA	3.04366	3.1622
Low	NA	NA	65.8106	NA	NA	4.09623
Low	NA	NA	17.8964	NA	NA	4.64608
Med	NA	37.5032	79.719	NA	2.11934	4.6287
Med	NA	49.1923	25.3411	NA	2.46168	4.15405
Med	NA	38.8042	18.0155	NA	2.25479	2.52199
Med	NA	NA	28.046	NA	NA	4.179
Med	NA	NA	57.912	NA	NA	5.81578
High	38.5037	58.0506	131.18	4.25824	2.75133	5.83845
High	100.726	58.701	31.0088	5.35874	4.24925	2.94099
High	16.3837	55.0098	52.1883	3.97097	2.89884	5.59025
High	39.1533	41.2733	78.3743	3.81837	1.69966	3.6327
High	42.4873	NA	244.318	3.77031	NA	6.18137
High	NA	NA	26.1728	NA	NA	2.90039
p-values
t-test (IP)	0.7246	NA	NA	0.067265	NA	NA
ANOVA* (Free Fed)	NA	0.0292	0.2344	NA	0.4359	0.2221
Cont vs Low	NA	0.155	0.3603	NA	0.475	0.0696
Cont vs Med	NA	0.9535	0.0476	NA	0.1272	0.0828
Cont vs High	NA	0.0685	0.1968	NA	0.6008	0.1393
Low vs Med	NA	0.1698	0.2486	NA	0.3742	0.9268
Low vs high	NA	0.0047	0.7222	NA	0.8048	0.6433
Med vs High	NA	0.0618	0.3877	NA	0.2414	0.713
*ANOVA analysis with Fishers uncorrected LSD

## Sheet: 2AG and AEA Plasma
Plasma	2-Arachidonoyl Glycerol (2-AG)	2-Arachidonoyl Glycerol (2-AG)	Arachidonoyl Ethanolamide (AEA)	Arachidonoyl Ethanolamide (AEA)
Dose	IP	Free Fed	IP	Free Fed
Control	4.29678	1.2806	0.477196	0.726374
Control	0	0	0.630528	0.463949
Control	0	3.16719	0.577557	0.630053
Low	NA	3.82141	NA	0.644016
Low	NA	4.83708	NA	0.612635
Low	NA	2.42284	NA	0.61749
Low	NA	6.684	NA	0.636044
Low	NA	0	NA	0.554507
Med	NA	7.95673	NA	0.548913
Med	NA	6.5967	NA	0.522799
Med	NA	0	NA	0.429299
High	4.66445	4.42405	0.350736	0.591091
High	8.77899	8.79209	0.558558	0.573571
High	0	0	0.81905	0.552871
High	NA	0	NA	0.745938
p-values
t-test (IP)	0.354675	NA	0.930151	na
ANOVA* (Free Fed)	NA	0.6689	NA	0.2798
Cont vs Low	NA	0.4093	NA	0.9314
Cont vs Med	NA	0.2372	NA	0.1435
Cont vs High	NA	0.4857	NA	0.8977
Low vs Med	NA	0.6002	NA	0.0914
Low vs high	NA	0.9123	NA	0.958
Med vs High	NA	0.5511	NA	0.0967
*ANOVA analysis with Fishers uncorrected LSD

## Sheet: eCBs Brain
Brain	Docosatetraenoyl Ethanolamide (DEA)	Docosatetraenoyl Ethanolamide (DEA)	Docosatetraenoyl Ethanolamide (DEA)	Docosahexaenoyl Ethanolamide (DHEa)	Docosahexaenoyl Ethanolamide (DHEa)	Docosahexaenoyl Ethanolamide (DHEa)	Linoleoyl Ethanolamide (LEA)	Linoleoyl Ethanolamide (LEA)	Linoleoyl Ethanolamide (LEA)	Oleoyl Ethanolamide (OEA)	Oleoyl Ethanolamide (OEA)	Oleoyl Ethanolamide (OEA)	Palmitoyl Ethanolamide (PEA)	Palmitoyl Ethanolamide (PEA)	Palmitoyl Ethanolamide (PEA)	Palmitoleoyl Ethanolamide (POEA)	Palmitoleoyl Ethanolamide (POEA)	Palmitoleoyl Ethanolamide (POEA)	Stearoyl Ethanolamide (SEA)	Stearoyl Ethanolamide (SEA)	Stearoyl Ethanolamide (SEA)
Dose	IP	Gavage	Free Fed	IP	Gavage	Free Fed	IP	Gavage	Free Fed	IP	Gavage	Free Fed	IP	Gavage	Free Fed	IP	Gavage	Free Fed	IP	Gavage	Free Fed
Control	0.826029	0.467591	1.0346	11.667	5.74449	10.0106	5.60176	2.98192	6.03035	18.5104	6.75375	30.8457	30.2763	10.51	49.5298	5.24646	1.74159	5.81182	3.00358	8.13854	7.03971
Control	0.686032	0.48299	0.523923	10.6171	8.65235	8.19477	4.83509	4.0702	3.82493	16.5268	9.36199	13.1206	30.6964	13.9335	27.5291	4.20675	2.25242	4.12486	2.48222	10.9521	1.93159
Control	1.26909	0.485676	0.739694	15.1973	7.06485	8.83069	6.7122	3.33292	4.1859	33.5354	7.13167	19.395	42.5885	11.6349	30.5976	6.60037	1.97262	4.89965	5.0728	8.04581	2.81001
Control	0.520013	NA	0.614162	8.03787	NA	7.51008	3.95355	NA	2.77466	12.7547	NA	13.8305	23.7253	NA	30.5185	3.46091	NA	3.83395	2.12455	NA	2.2438
Control	0.543813	NA	0.656843	7.44238	NA	7.84926	3.41058	NA	3.59059	12.3791	NA	21.6951	26.9572	NA	38.1062	3.40526	NA	3.55896	1.89036	NA	7.76239
Low	NA	0.426575	0.352305	NA	7.41745	5.24954	NA	3.11876	2.06501	NA	6.35811	10.7339	NA	9.83872	25.7163	NA	1.61448	2.47086	NA	7.13283	1.48174
Low	NA	0.428293	0.571894	NA	6.78454	8.25573	NA	2.96612	4.33512	NA	5.5362	18.3209	NA	10.7246	32.9996	NA	1.73979	4.22222	NA	7.81255	3.05808
Low	NA	0.488033	0.275036	NA	6.99568	5.16236	NA	3.73448	2.69565	NA	6.52012	11.8219	NA	11.341	20.2496	NA	2.06363	2.53512	NA	9.58275	1.18991
Low	NA	NA	0.461376	NA	NA	6.7676	NA	NA	2.15949	NA	NA	18.0153	NA	NA	32.0484	NA	NA	2.32234	NA	NA	3.06516
Low	NA	NA	0.396709	NA	NA	6.52974	NA	NA	1.98058	NA	NA	7.87259	NA	NA	24.7375	NA	NA	2.84157	NA	NA	0.780893
Med	NA	0.368087	0.50728	NA	5.59983	8.11519	NA	2.28812	3.0175	NA	5.50109	16.177	NA	8.28849	28.815	NA	1.40845	3.92683	NA	6.40303	1.74256
Med	NA	0.403881	0.211139	NA	5.91588	6.06171	NA	2.51917	3.01872	NA	4.42597	10.8204	NA	9.06561	21.7809	NA	1.40521	2.86342	NA	4.81803	1.03364
Med	NA	0.311346	0.278516	NA	5.79253	4.52815	NA	2.67752	2.61945	NA	5.42867	7.63691	NA	7.86067	20.486	NA	1.55578	2.49028	NA	6.97739	0.401981
Med	NA	NA	0.405003	NA	NA	6.86866	NA	NA	3.07206	NA	NA	16.2126	NA	NA	31.1573	NA	NA	2.71036	NA	NA	2.27015
Med	NA	NA	0.632833	NA	NA	8.68985	NA	NA	2.76	NA	NA	18.0926	NA	NA	31.1686	NA	NA	3.62202	NA	NA	1.95059
High	0.38354	0.526262	0.94148	6.88429	6.80045	7.92991	2.64236	3.2457	3.25668	9.2812	6.60485	19.7542	26.0578	11.5753	32.005	3.067	1.77538	2.70936	0.891427	8.70392	3.30602
High	0.644126	0.592015	0.195302	9.74939	10.5772	5.13253	4.17813	5.06387	2.00186	17.7759	8.77638	9.55434	31.2108	16.4553	22.1406	4.84518	2.68386	2.67668	2.07275	12.9215	0.93033
High	0.387825	0.527784	0.484999	6.42439	8.12141	7.86649	2.75924	3.40062	3.90026	8.6587	7.68613	15.1631	27.0789	12.5318	28.3414	2.90774	1.82674	3.94041	1.14252	9.22488	1.90014
High	0.292576	0.270733	0.471008	7.62448	4.38443	6.66065	2.83608	1.96828	1.85206	12.3813	4.82256	12.9528	27.4419	7.51916	27.8416	3.35422	1.14312	2.23626	1.23877	4.02084	1.83867
High	0.583513	NA	0.805566	7.52839	NA	8.89035	2.2571	NA	2.8491	14.4744	NA	16.1753	28.5796	NA	32.9033	2.58192	NA	2.97587	2.18963	NA	3.04113
High	NA	NA	0.322823	NA	NA	5.00604	NA	NA	1.77508	NA	NA	9.66182	NA	NA	21.5397	NA	NA	1.73962	NA	NA	1.36276
p-values
t-test (IP)	0.072764	NA	NA	0.085502	NA	NA	0.019093	NA	NA	0.178785	NA	NA	0.426103	NA	NA	0.125464	NA	NA	0.055593	NA	NA
ANOVA (Free Fed)	NA	0.3327	0.1024	NA	0.5965	0.1424	NA	0.4474	0.0561	NA	0.1216	0.1848	NA	0.2325	0.1243	NA	0.4478	0.0083	NA	0.4468	0.0443
Cont vs Low	NA	0.6685	0.0342	NA	0.9496	0.0326	NA	0.7812	0.0219	NA	0.1453	0.064	NA	0.4811	0.0539	NA	0.5908	0.005	NA	0.6656	0.0264
Cont vs Med	NA	0.1299	0.0321	NA	0.3315	0.0875	NA	0.1766	0.0525	NA	0.0286	0.0823	NA	0.088	0.0427	NA	0.1391	0.0145	NA	0.1603	0.0107
Cont vs High	NA	0.9971	0.1778	NA	0.8073	0.086	NA	0.9473	0.0147	NA	0.4325	0.0744	NA	0.9975	0.0529	NA	0.6779	0.0017	NA	0.861	0.029
Low vs Med	NA	0.252	0.9759	NA	0.3615	0.6141	NA	0.2681	0.6673	NA	0.3391	0.8947	NA	0.2689	0.9062	NA	0.3145	0.6217	NA	0.3067	0.6681
Low vs high	NA	0.6448	0.3315	NA	0.7558	0.5515	NA	0.8172	0.9373	NA	0.4003	0.8683	NA	0.4541	0.9351	NA	0.8711	0.7302	NA	0.7728	0.88
Med vs High	NA	0.1078	0.3167	NA	0.2105	0.9441	NA	0.1679	0.5984	NA	0.0814	0.978	NA	0.0715	0.8381	NA	0.224	0.3935	NA	0.1794	0.5506
*ANOVA analysis with Fishers uncorrected LSD

## Sheet: eCBs Plasma
Plasma	2-Linoleoyl Glycerol (2-LG)	2-Linoleoyl Glycerol (2-LG)	Docosahexaenoyl Ethanolamide (DHEa)	Docosahexaenoyl Ethanolamide (DHEa)	Linoleoyl Ethanolamide (LEA)	Linoleoyl Ethanolamide (LEA)	Oleoyl Ethanolamide (OEA)	Oleoyl Ethanolamide (OEA)	Palmitoyl Ethanolamide (PEA)	Palmitoyl Ethanolamide (PEA)	Palmitoleoyl Ethanolamide (POEA)	Palmitoleoyl Ethanolamide (POEA)	Stearoyl Ethanolamide (SEA)	Stearoyl Ethanolamide (SEA)
Dose	IP	Free Fed	IP	Free Fed	IP	Free Fed	IP	Free Fed	IP	Free Fed	IP	Free Fed	IP	Free Fed
Control	258.592	103.007	0.835713	1.2939	3.92444	3.70429	4.15344	3.61905	6.60588	5.20112	1.04364	0.870134	2.88428	1.98252
Control	270.663	523.042	0.774709	0.43638	5.63198	6.2834	3.70137	3.39079	5.61497	3.67961	1.3224	1.92281	1.80772	1.5039
Control	154.856	398.921	0.800977	0.648709	3.90827	4.14771	4.51795	3.29769	6.33661	5.07092	1.24563	1.35031	1.6977	1.31093
Low	NA	417.063	NA	0.796058	NA	5.17876	NA	4.15947	NA	5.21878	NA	1.39306	NA	1.73318
Low	NA	162.92	NA	0.817971	NA	4.92271	NA	3.56677	NA	4.15063	NA	0.558727	NA	1.59353
Low	NA	168.079	NA	1.23082	NA	4.58934	NA	3.328	NA	5.89908	NA	0.81385	NA	2.06206
Low	NA	412.901	NA	0.817302	NA	4.67491	NA	3.40427	NA	5.11226	NA	1.68925	NA	1.54842
Low	NA	298.012	NA	0.658567	NA	4.43355	NA	2.9354	NA	3.6018	NA	1.00603	NA	1.48358
Med	NA	289.937	NA	0.511234	NA	3.51351	NA	3.85193	NA	4.89158	NA	1.17495	NA	1.17705
Med	NA	421.42	NA	0.452788	NA	5.26943	NA	3.43165	NA	3.88301	NA	1.56418	NA	1.50973
Med	NA	209.954	NA	0.41894	NA	5.16179	NA	3.14108	NA	4.6505	NA	1.44613	NA	1.57096
High	442.759	256.24	0.431317	0.68441	3.62478	4.1515	2.45946	3.79718	5.04651	6.03361	1.16168	0.979849	1.56533	2.11269
High	308.365	415.925	0.793892	0.415701	3.38633	5.39426	3.32143	3.59236	4.98357	3.95448	0.934411	1.57795	1.41978	1.54067
High	772.768	380.588	0	0.375056	5.7684	5.36182	3.19912	3.44995	4.69575	4.47915	1.63143	1.7888	1.8421	1.46197
High	NA	295.525	NA	0	NA	6.26201	NA	3.708	NA	5.54537	NA	1.5756	NA	1.64576
p-values
t-test (IP)	0.121475	NA	0.158631	NA	0.823023	NA	0.034447	NA	0.015809	NA	0.877105	NA	0.259295	NA
ANOVA* (Free Fed)	NA	0.1301	NA	0.0655	NA	0.731	NA	0.838	NA	0.8676	NA	0.5235	NA	0.5495
Cont vs Low	NA	0.6179	NA	0.7217	NA	0.9412	NA	0.8589	NA	0.8196	NA	0.3525	NA	0.6716
Cont vs Med	NA	0.7563	NA	0.1619	NA	0.9306	NA	0.8929	NA	0.8051	NA	0.9687	NA	0.4371
Cont vs High	NA	0.9648	NA	0.0666	NA	0.4019	NA	0.4371	NA	0.6005	NA	0.7473	NA	0.6577
Low vs Med	NA	0.8776	NA	0.0659	NA	0.8642	NA	0.9782	NA	0.6159	NA	0.3316	NA	0.2082
Low vs high	NA	0.6219	NA	0.0201	NA	0.3821	NA	0.4865	NA	0.7259	NA	0.1797	NA	0.9653
Med vs High	NA	0.7735	NA	0.6735	NA	0.3543	NA	0.5233	NA	0.4354	NA	0.7792	NA	0.2144
*ANOVA analysis with Fishers uncorrected LSD
